# Supplementary material
Source: publisher site journal article supplement (https://static.cambridge.org/content/id/urn:cambridge.org:id:article:S1041610206004443/resource/name/IPG_McAiney_Text_Supplement.doc)
Supplement: Supplementary file 1 [file IPG_McAiney_Text_Supplement.doc]

**TEXT SUMMARY OF THE ON-LINE SUPPLEMENT TO:**

**EVALUATION OF THE SUSTAINED IMPLEMENTATION OF A MENTAL HEALTH LEARNING INITIATIVE IN LONG-TERM CARE**

This supplement provides a detailed description of the “Putting the P.I.E.C.E.S. Together” Learning Initiative, an education program for the management of mental health problems in long-term care (LTC) homes. Information is provided about the goals of the initiative, target audience, core competencies and performance objectives, and ongoing support and sustainability.
